# Supplementary material for: The Association of Life’s Simple 7 with Aldosterone among African Americans in the Jackson Heart Study
Source: PubMed Central journal article supplement (PMC6566676; doi:10.3390/nu11050955), 2019-04-26
Supplement: nutrients-11-00955-s001.pdf [file nutrients-11-00955-s001.pdf]

**Table S1.** Baseline characteristics comparison between excluded and included participants.

| Variable <sup>a</sup>                                      | Level                                    | Excluded (N = 1211) | Included (N = 4095) | p-value |
|------------------------------------------------------------|------------------------------------------|---------------------|---------------------|---------|
| Age                                                        |                                          | 55.7 (13.65)        | 55.24 (12.62)       | 0.2717  |
| Sex                                                        | Women                                    | 727 (60.03)         | 2644 (64.57)        | 0.0040  |
|                                                            | Men                                      | 484 (39.97)         | 1451 (35.43)        |         |
| Education                                                  | Less than high school                    | 319 (26.9)          | 757 (18.49)         | <0.0001 |
|                                                            | High school graduate / GED               | 218 (18.38)         | 734 (17.92)         |         |
|                                                            | Attended vocational school /Trade school | 649 (54.72)         | 2604 (63.59)        |         |
| Occupation                                                 | Management/Professional                  | 332 (27.42)         | 1546 (37.75)        | <0.0001 |
|                                                            | Other                                    | 879 (72.58)         | 2549 (62.25)        |         |
| Alcohol use                                                | No                                       | 626 (53.01)         | 2231 (54.48)        | 0.3701  |
|                                                            | Yes                                      | 555 (46.99)         | 1864 (45.52)        |         |
| Current Smoker                                             | No                                       | 961 (82)            | 3604 (88.2)         | <0.0001 |
|                                                            | Yes                                      | 211 (18)            | 482 (11.8)          |         |
| BMI, kg/m <sup>2</sup>                                     |                                          | 31.78 (7.45)        | 31.74 (7.18)        | 0.8918  |
| Blood Pressure, mmHg                                       | Systolic Blood Pressure                  | 127.66 (17.55)      | 127.43 (16.71)      | 0.6908  |
|                                                            | Diastolic Blood Pressure                 | 74.94 (9.33)        | 75.93 (8.6)         | 0.0006  |
| Aldosterone (ng/dL) <sup>b</sup>                           |                                          | 5.8 (4.45)          | 5.81 (5.82)         | 0.9610  |
| eGFR <sup>c</sup> (CKD-EPI) ml/min per 1.73 m <sup>2</sup> |                                          | 85.99 (20.66)       | 85.85 (17.95)       | 0.8231  |
| Total Cholesterol, mg/dL                                   |                                          | 196.4 (43.83)       | 199.83 (39.4)       | 0.0342  |
| Fasting Plasma Glucose, mg/dL                              |                                          | 100.02 (35.08)      | 100.05 (33.05)      | 0.9853  |
| Hemoglobin A1c (%)                                         |                                          | 6.25 (1.56)         | 5.91 (1.2)          | <0.0001 |
|                                                            | No                                       | 775 (67.69)         | 3313 (80.9)         |         |
| Baseline Diabetes                                          | Yes                                      | 370 (32.31)         | 782 (19.1)          | <0.0001 |
|                                                            | Poor                                     | 211 (18.79)         | 482 (11.77)         |         |
| Smoking                                                    | Intermediate                             | 16 (1.42)           | 48 (1.17)           | <0.0001 |
|                                                            | Ideal                                    | 896 (79.79)         | 3565 (87.06)        |         |
|                                                            | Poor                                     | 657 (54.89)         | 2165 (52.87)        |         |
| Body Mass Index                                            | Intermediate                             | 341 (28.49)         | 1360 (33.21)        | 0.0027  |
|                                                            | Ideal                                    | 199 (16.62)         | 570 (13.92)         |         |
|                                                            | Poor                                     | 652 (54.06)         | 1963 (47.94)        |         |
| Physical Activity                                          | Intermediate                             | 337 (27.94)         | 1336 (32.63)        | 0.0007  |
|                                                            | Ideal                                    | 217 (17.99)         | 796 (19.44)         |         |
|                                                            | Poor                                     | 331 (49.7)          | 2350 (57.39)        |         |
| Dietary Intake                                             | Intermediate                             | 324 (48.65)         | 1706 (41.66)        | 0.0005  |
|                                                            | Ideal                                    | 11 (1.65)           | 39 (0.95)           |         |
|                                                            | Poor                                     | 267 (23.2)          | 848 (20.71)         |         |
| Blood Pressure                                             | Intermediate                             | 692 (60.12)         | 2415 (58.97)        | 0.0117  |
|                                                            | Ideal                                    | 192 (16.68)         | 832 (20.32)         |         |
|                                                            | Poor                                     | 104 (15.83)         | 602 (14.7)          |         |
| Total Cholesterol                                          | Intermediate                             | 232 (35.31)         | 1639 (40.02)        | 0.0718  |
|                                                            | Ideal                                    | 321 (48.86)         | 1854 (45.27)        |         |
|                                                            | Poor                                     | 289 (32.36)         | 666 (16.26)         |         |
| Fasting Plasma Glucose                                     | Intermediate                             | 350 (39.19)         | 1606 (39.22)        | <0.0001 |
|                                                            | Ideal                                    | 254 (28.44)         | 1823 (44.52)        |         |

<sup>a</sup> Mean (Standard deviation) or Count (percentage) is listed. <sup>b</sup> Median (Q1, Q3) is used due to right skewed distribution of aldosterone. <sup>c</sup> EGFR CKD-EPI = Estimated glomerular filtration rate based on the Chronic Kidney Disease Epidemiology Collaboration.

**Table S2.** Definitions of Poor, Intermediate, Ideal Cardiovascular Health <sup>a</sup>.

| Goal/Metric                     | Poor health           | Intermediate health                                                      | Ideal health                                                              |
|---------------------------------|-----------------------|--------------------------------------------------------------------------|---------------------------------------------------------------------------|
| Current smoking                 | Yes                   | Former ≤ 12 months                                                       | Never or quit ≥12 months                                                  |
| Total cholesterol               | ≥240 mg/dL            | 200–239 mg/dl or treated to goal                                         | <200 mg/dl                                                                |
| Blood pressure                  | SBP≥140 or DBP ≥90    | SBP 120-139 or DBP 80-89 or treated to goal                              | <120/<80 mm Hg                                                            |
| Fasting plasma glucose          | ≥126 mg/dL            | 100–125 mg/dl or treated to goal                                         | <100 mg/dL                                                                |
| Body mass index                 | ≥30 kg/m <sup>2</sup> | 25–29.9 kg/m <sup>2</sup>                                                | <25 kg/m <sup>2</sup>                                                     |
| Physical activity               | None                  | 1-149 min/week moderate intensity<br>or 1-74 min/week vigorous intensity | ≥150 min/week moderate<br>intensity or ≥75 min/week<br>vigorous intensity |
| Healthy diet score <sup>b</sup> | 0-1 components        | 2-3 components                                                           | 4–5 components                                                            |
| Points for LS7 Score per Metric | 0                     | 0                                                                        | 1                                                                         |

<sup>a</sup> Adapted from The American Heart Association’s Strategic Planning Task Force and Statistical Committee 2020 Guidelines[1]. <sup>b</sup> Adapted for JHS: Fruits and vegetables ≥4.5 cups/day, non-fried fish ≥two 3.5 ounce servings per week, fiber-rich whole grains ≥ three 1 ounce servings/day, sodium <1500 mg/day, sugar-sweetened beverages ≤ 36 ounces/week.

**Table S3.** The Association of Categorical and Continuous LS7 Scores with Aldosterone among All Participants(excluding participants with aldosterone below the lower limit) and Stratified by Age, Sex, Diabetes Status, Estimated Glomerular Filtration Rate (eGFR).

|                                                                                                                                    | Aldosterone<br>(median and<br>IQR) | n (%) of participants taking<br>ACE-inhibitors, ARBs,<br>mineralocorticoid receptor<br>antagonists and statin<br>medications <sup>f</sup> | Categorical LS7<br>Mean ratio (95% CI) |                   | Continuous<br>LS7<br>Exp(β) |
|------------------------------------------------------------------------------------------------------------------------------------|------------------------------------|-------------------------------------------------------------------------------------------------------------------------------------------|----------------------------------------|-------------------|-----------------------------|
|                                                                                                                                    |                                    |                                                                                                                                           | Intermediate vs Poor                   | Ideal vs. poor    |                             |
| All participants, <i>n</i> = 3382                                                                                                  | 5.10 (3.40, 8.00)                  | 1110 (32.82)                                                                                                                              | 0.87 (0.82, 0.93)                      | 0.71 (0.63, 0.79) | 0.90 (0.88, 0.93)           |
| All participants, after adjusting for<br>ACE-inhibitors, ARBs,<br>mineralocorticoid receptor antagonists<br>and statin medications |                                    |                                                                                                                                           | 0.83 (0.77, 0.91)                      | 0.60 (0.47, 0.77) | 0.87 (0.83, 0.91)           |
| Age <median <sup>a</sup> , <i>n</i> = 1698                                                                                         | 5.00 (3.40, 7.70)                  | 357 (21.02)                                                                                                                               | 0.70 (0.64, 0.77)                      | 0.63 (0.55, 0.71) | 0.87 (0.84, 0.90)           |
| Age >median <sup>a</sup> , <i>n</i> = 1684                                                                                         | 5.20 (3.40, 8.20)                  | 753 (44.71)                                                                                                                               | 1.03 (0.94, 1.12)                      | 0.78 (0.62, 0.98) | 0.96 (0.92, 1.00)           |
| Men <sup>b</sup> , <i>n</i> = 1270                                                                                                 | 5.30 (3.60, 8.10) <sup>e</sup>     | 383 (30.16)                                                                                                                               | 0.97 (0.87, 1.08)                      | 0.83 (0.70, 0.99) | 0.95 (0.91, 0.99)           |

|                                                              |                                |             |                   |                   |                   |
|--------------------------------------------------------------|--------------------------------|-------------|-------------------|-------------------|-------------------|
| Women <sup>b</sup> , <i>n</i> = 2112                         | 5.00 (3.30, 8.00) <sup>e</sup> | 727 (34.42) | 0.83 (0.77, 0.89) | 0.65 (0.56, 0.75) | 0.87 (0.84, 0.90) |
| Participants without diabetes <sup>c</sup> , <i>n</i> = 2712 | 5.00 (3.40, 7.70) <sup>e</sup> | 706 (26.03) | 0.84 (0.78, 0.91) | 0.70 (0.63, 0.79) | 0.90 (0.88, 0.93) |
| Participants with diabetes <sup>c</sup> , <i>n</i> = 670     | 5.50 (3.60, 9.00) <sup>e</sup> | 404 (60.30) | 1.00 (0.90, 1.12) | 0.67 (0.20, 2.31) | 0.95 (0.88, 1.03) |
| eGFR <median <sup>d</sup> , <i>n</i> = 1783                  | 5.50 (3.70, 8.70) <sup>e</sup> | 711 (39.88) | 0.87 (0.80, 0.95) | 0.67 (0.56, 0.79) | 0.89 (0.86, 0.93) |
| eGFR >median <sup>d</sup> , <i>n</i> = 1599                  | 4.70 (3.20, 7.20) <sup>e</sup> | 399 (24.95) | 0.86 (0.77, 0.96) | 0.73 (0.62, 0.85) | 0.90 (0.87, 0.95) |

All analyses adjusted for age, sex, education, occupation, alcohol use and estimated glomerular filtration rate. <sup>a</sup> The p-values for the interaction of age with the association of categorical and continuous LS7 scores with aldosterone were  $p < 0.0001$  and  $p = 0.0006$ , respectively. <sup>b</sup> the p-values for the interaction of sex with the association of categorical and continuous LS7 scores with aldosterone were  $p = 0.0205$  and  $p = 0.0013$ , respectively. <sup>c</sup> The p-values for the interaction of diabetes with the association of categorical and continuous LS7 scores with aldosterone were  $p = 0.0460$  and  $p = 0.2456$ , respectively. <sup>d</sup> The p-values for the interaction of eGFR with the association of categorical and continuous LS7 scores with aldosterone were  $p = 0.6494$  and  $p = 0.5243$ , respectively. <sup>e</sup>  $p < 0.0001$  using wilcoxon rank sum test <sup>f</sup> P-values for differences in medication usage using wilcoxon rank sum test age  $p < 0.0001$ , sex  $p = 0.0268$ , diabetes  $p < 0.0001$ , eGFR  $p < 0.0001$  <sup>a</sup> Median age was 55.5(45.44, 64.64) <sup>d</sup> Median eGFR was 94.04 (80.46, 107.55) ACE-inhibitors (Angiotensin Converting Enzyme), ARB (Angiotensin Receptor Blocker).

**Table S4.** The association of Life's Simple 7 with Aldosterone, (A) Median aldosterone levels across three categories of total LS7 scores using 0–14 scoring system and (B) the association of categorical and continuous LS7 scores (using 0-14 scoring system <sup>a</sup>) with aldosterone among all participants.

**Table S4A.**

|                     | Inadequate ( <i>n</i> = 420) | Average ( <i>n</i> = 3119) | Optimal ( <i>n</i> = 556) | <i>p</i> -value <sup>b</sup> |
|---------------------|------------------------------|----------------------------|---------------------------|------------------------------|
| Aldosterone (ng/dL) | 5.00 (3.10, 8.20)            | 4.40 (2.60, 7.30)          | 3.75 (2.30, 5.80)         | <0.0001                      |

**Table S4B.**

| All participants    | Average vs Inadequate | Optimal vs. Inadequate | Continuous LS7<br>Exp( $\beta$ ) |
|---------------------|-----------------------|------------------------|----------------------------------|
| Mean ratio (95% CI) | 0.91 (0.84, 1.00)     | 0.72 (0.64, 0.83)      | 0.94 (0.93, 0.96)                |

<sup>a</sup> Analysis using 0-14 scoring system with poor ==0, intermediate ==1 and ideal==2, inadequate (0–4 points), average (5–9 points), and optimal (10–14 points) <sup>b</sup> Wilcoxon rank sum test used.

**Table S5.** Association of Individual LS7 Metrics with Aldosterone stratified by Sex among All Participants and after excluding participants on medications altering aldosterone.

| Among all participants | Among participants after excluding subjects on aldosterone altering medications |
|------------------------|---------------------------------------------------------------------------------|
|------------------------|---------------------------------------------------------------------------------|

| Individual LS7 metrics | Sex   | <i>p</i> -value <sup>c</sup> | Intermediate vs Poor <sup>a</sup> | Ideal vs Poor <sup>a</sup> | <i>p</i> -value <sup>c</sup> | Intermediate vs Poor <sup>b</sup> | Ideal vs Poor <sup>b</sup> |
|------------------------|-------|------------------------------|-----------------------------------|----------------------------|------------------------------|-----------------------------------|----------------------------|
| Smoking                | Men   | <0.0001                      | 1.07 (0.73, 1.59)                 | 0.96 (0.83, 1.10)          | <0.0001                      | 1.15 (0.72, 1.83)                 | 0.92 (0.78, 1.08)          |
|                        | Women |                              | 0.59 (0.39, 0.89)                 | 0.58 (0.53, 0.64)          |                              | 0.53 (0.30, 0.96)                 | 0.48 (0.44, 0.53)          |
| Body Mass Index        | Men   | 0.0001                       | 0.81 (0.73, 0.90)                 | 0.77 (0.6, 0.90)           | 0.0320                       | 0.87 (0.76, 0.98)                 | 0.82 (0.68, 0.98)          |
|                        | Women |                              | 1.06 (0.99, 1.15)                 | 0.86 (0.76, 0.98)          |                              | 1.06 (0.96, 1.16)                 | 0.80 (0.68, 0.94)          |
| Physical activity      | Men   | 0.0392                       | 1.07 (0.96, 1.20)                 | 1.09 (0.96, 1.23)          | 0.0352                       | 1.05 (0.92, 1.21)                 | 0.97 (0.83, 1.130)         |
|                        | Women |                              | 0.89 (0.82, 0.97)                 | 1.02 (0.93, 1.12)          |                              | 0.86 (0.77, 0.95)                 | 1.00 (0.89, 1.13)          |
| Diet                   | Men   | 0.0342                       | 1.12 (1.02, 1.23)                 | 1.01 (0.54, 1.86)          | 0.0897                       | 1.06 (0.94, 1.20)                 | 1.08 (0.50, 2.32)          |
|                        | Women |                              | 0.96 (0.90, 1.04)                 | 0.64 (0.40, 1.03)          |                              | 0.91 (0.83, 1.00)                 | 0.53 (0.23, 1.22)          |
| Blood Pressure         | Men   | 0.1188                       | 1.01 (0.90, 1.13)                 | 0.85 (0.72, 1.01)          | 0.0196                       | 0.99 (0.86, 1.15)                 | 0.90 (0.75, 1.08)          |
|                        | Women |                              | 1.05 (0.96, 1.15)                 | 0.73 (0.63, 0.84)          |                              | 1.18 (1.04, 1.34)                 | 0.83 (0.70, 0.98)          |
| Total Cholesterol      | Men   | 0.0746                       | 1.10 (0.94, 1.28)                 | 1.01 (0.87, 1.18)          | 0.0746                       | 1.03 (0.86, 1.24)                 | 0.99 (0.83, 1.18)          |
|                        | Women |                              | 1.02 (0.92, 1.12)                 | 0.84 (0.76, 0.93)          |                              | 1.26 (1.10, 1.44)                 | 0.93 (0.81, 1.06)          |
| Glucose                | Men   | 0.5520                       | 0.85 (0.75, 0.97)                 | 0.81 (0.71, 0.93)          | 0.5520                       | 0.81 (0.68, 0.97)                 | 0.78 (0.65, 0.93)          |
|                        | Women |                              | 0.84 (0.77, 0.92)                 | 0.76 (0.69, 0.83)          |                              | 0.77 (0.68, 0.88)                 | 0.73 (0.64, 0.83)          |

<sup>a</sup> Among all participants <sup>b</sup> among participants after excluding aldosterone altering medications <sup>c</sup> *p*-value obtained using Wilcoxon rank sum test.
